# Supplementary material for: Universal Triboelectric Nanogenerator Simulation Based on Dynamic Finite Element Method Model
Source: MDPI journal article supplement (doi:10.3390/s20174838), 2020-08-27
Supplement: s1 [file s1]

# Universal triboelectric nanogenerator simulation based on dynamic finite element method model

Jinkai Chen<sup>1\*</sup>, Junchao Wang<sup>1</sup>, Weipeng Xuan<sup>1</sup>, Shurong Dong<sup>2</sup>, Jikui Luo<sup>1,2\*</sup>

<sup>1</sup> Ministry of Education Key Lab of RF Circuits and Systems, College of Electronics & Information, Hangzhou Dianzi University, Hangzhou, 310000, China.

<sup>2</sup> Key Lab of Advanced Micro/Nano Electronic Devices & Smart Systems of Zhejiang, College of Information Science & Electronic Engineering, Zhejiang University, Hangzhou, 310000, China.

\*Email: chenjk09@hdu.edu.cn, jackluo@zju.edu.cn

Table S1 Parameters used for contact mode simulation in cosine movement.

|                                 |                                                          |
|---------------------------------|----------------------------------------------------------|
| Material 2                      | $d_1 = 100 \text{ } \mu\text{m}$ , $\epsilon_{r1} = 7.2$ |
| Material 1                      | $d_2 = 100 \text{ } \mu\text{m}$ , $\epsilon_{r2} = 2.7$ |
| Contact area $S$                | $25 \text{ cm}^2$                                        |
| Surface charge density $\sigma$ | $22 \text{ } \mu\text{C/m}^2$                            |
| Separation distance $x_{max}$   | $0.004 \text{ m}$                                        |
| Average velocity $v$            | $0.04 \text{ m/s}$                                       |

Table S2 Simulation time under different air gap thickness. (Simulation is processed using parameters shown in Table S1 with  $10 \text{ M}\Omega$  external load. The mapped mesh for vertical and horizontal boundary is

10 and 50, respectively.)

|                                     |     |     |     |     |
|-------------------------------------|-----|-----|-----|-----|
| Air gap thickness ( $\mu\text{m}$ ) | 0.1 | 1   | 10  | 100 |
| Simulation Time (s)                 | 302 | 283 | 262 | 249 |

Table S3 Parameters used for contact mode simulation in practical movement.

|                                 |                                                         |
|---------------------------------|---------------------------------------------------------|
| Glass (Material 2)              | $d_1 = 1 \text{ mm}, \varepsilon_{r1} = 7.2$            |
| PDMS (Material 1)               | $d_2 = 100 \text{ }\mu\text{m}, \varepsilon_{r2} = 2.7$ |
| Contact area $S$                | $25 \text{ cm}^2$                                       |
| Surface charge density $\sigma$ | $22 \text{ }\mu\text{C/m}^2$                            |
| Separation distance $x_{max}$   | $0.004 \text{ m}$                                       |
| Average velocity $v$            | $0.04 \text{ m/s}$                                      |

Table S4. Fitted curve formulas for practical movement.

| Time $t$ (s)     | Movement formula $x$ (mm)                                     | $R^2$   |
|------------------|---------------------------------------------------------------|---------|
| $[0, 0.022)$     | $x = 0$                                                       | 1       |
| $[0.022, 0.025)$ | $x = 6.67037t - 0.1467$                                       | 0.99589 |
| $[0.025, 0.064)$ | $y = 61.34173t - 1.51307$                                     | 0.99981 |
| $[0.064, 0.1]$   | $y = 0.75497 + 2.41793 \sin(\pi \frac{t + 0.68721}{0.12039})$ | 0.99899 |

Table S5 Parameters used for sliding mode simulation in cosine movement.

|                                       |                                                       |
|---------------------------------------|-------------------------------------------------------|
| PTFE (Material 2)                     | $d_1 = 220 \text{ }\mu\text{m}, \varepsilon_{r1} = 2$ |
| Nylon (Material 1)                    | $d_2 = 220 \text{ }\mu\text{m}, \varepsilon_{r2} = 4$ |
| Contact area $S$                      | $0.01 \text{ m}^2 (0.1 \text{ m} * 0.1 \text{ m})$    |
| Surface charge density $\sigma$       | $7 \text{ }\mu\text{C/m}^2$                           |
| Maximum separation distance $x_{max}$ | $0.08 \text{ m}$                                      |
| Velocity $v$                          | $1 \text{ m/s}$                                       |
